# Supplementary material for: The external electric field effect on the charge transport performance of organic semiconductors: a theoretical investigation
Source: Royal Society of Chemistry journal article supplement (doi:10.1039/d1ta05762f), 2021-01-01
Supplement: d1ta05762f1.pdf [file d1ta05762f1.pdf]

## Supporting Information

### **The external electric field effect on the charge transport performance of organic semiconductors: a theoretical investigation**

**Xueying Lu,<sup>a</sup> Yajing Sun<sup>\*a</sup> and Wenping Hu<sup>\*a</sup>**

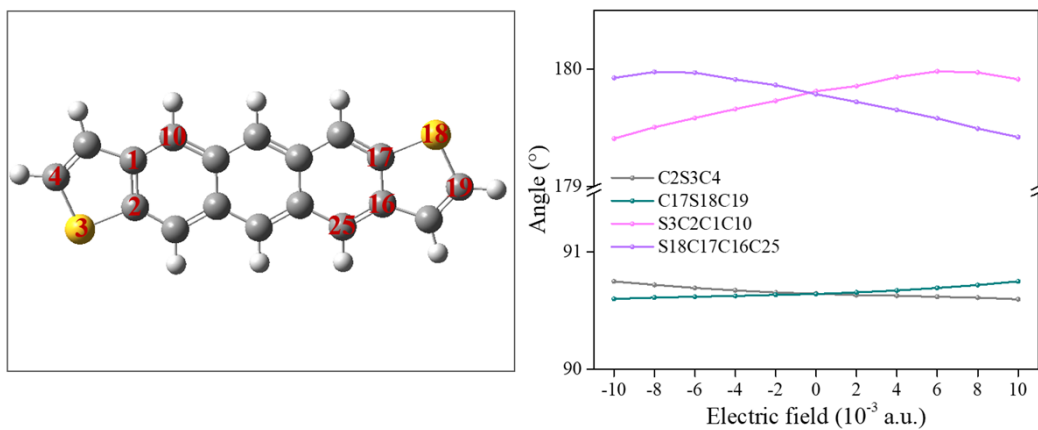

**Fig. S1** Bond angle and dihedral angle of ADT at different electric field.

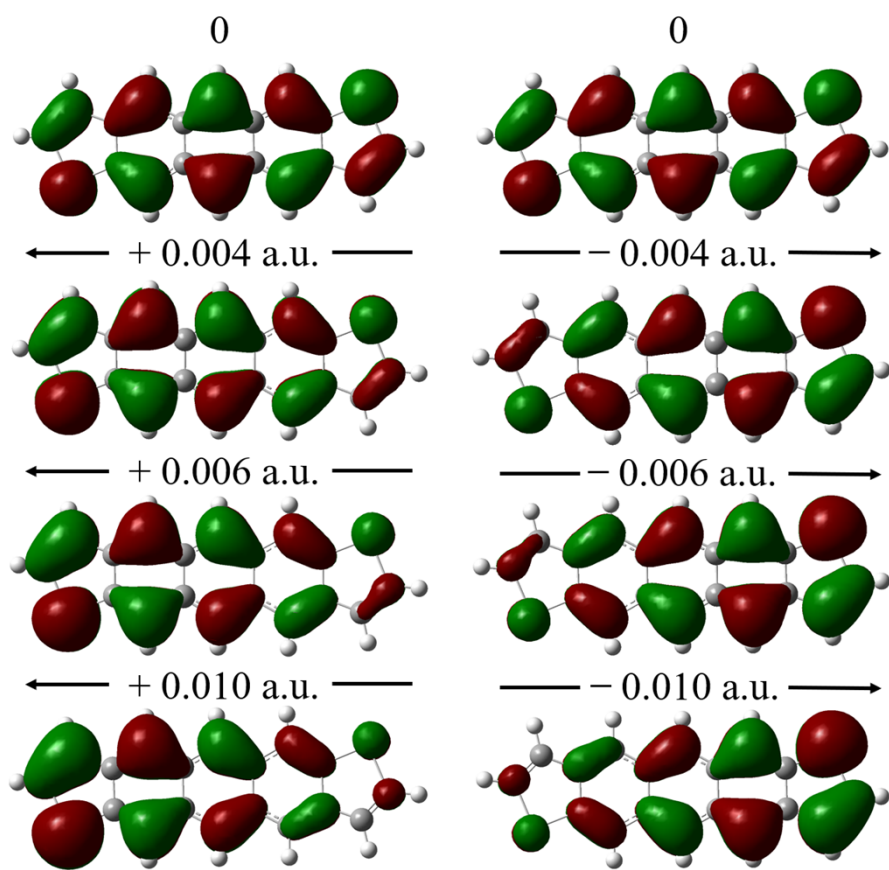

**Fig. S2** HOMO distribution of ADT at different electric field.

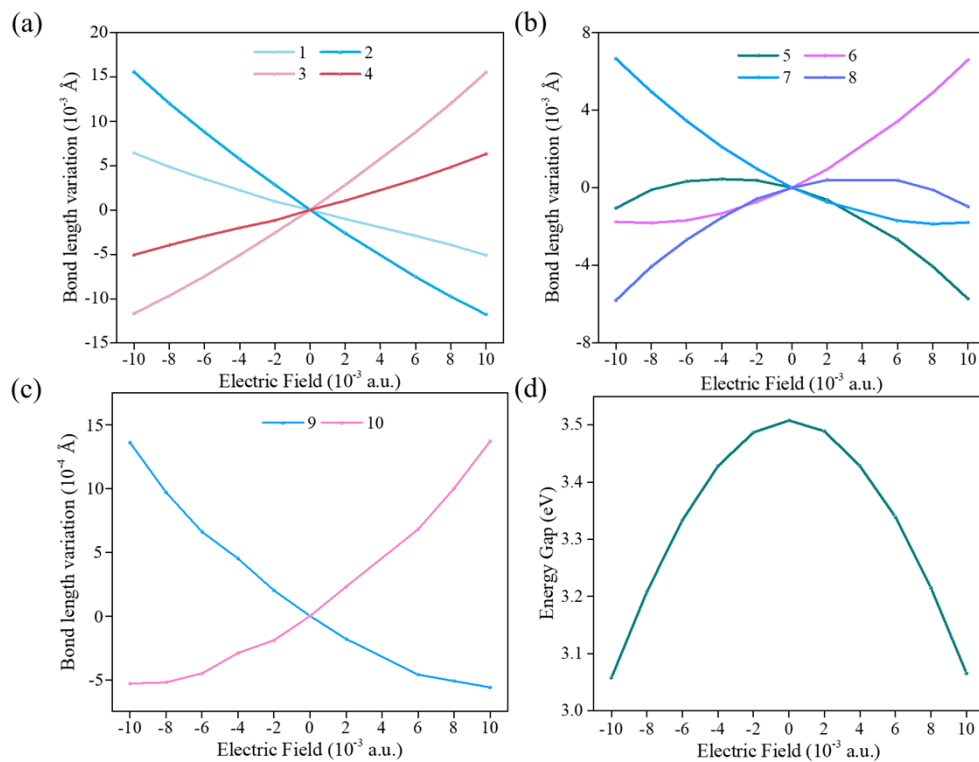

**Fig. S3** Bond length variation at different electric field of (a) C-S bond (b) C-C bond and (c) C-H bond in NDT molecule. (d) The energy gap of HOMO and LUMO at different electric field.

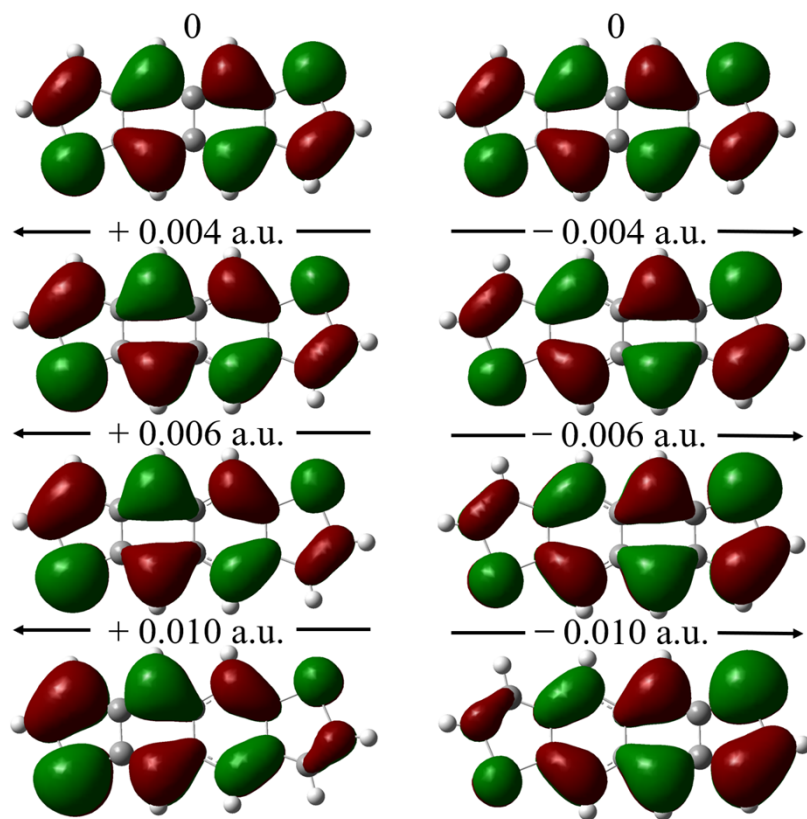

**Fig. S4** HOMO distribution of NDT at different electric field.

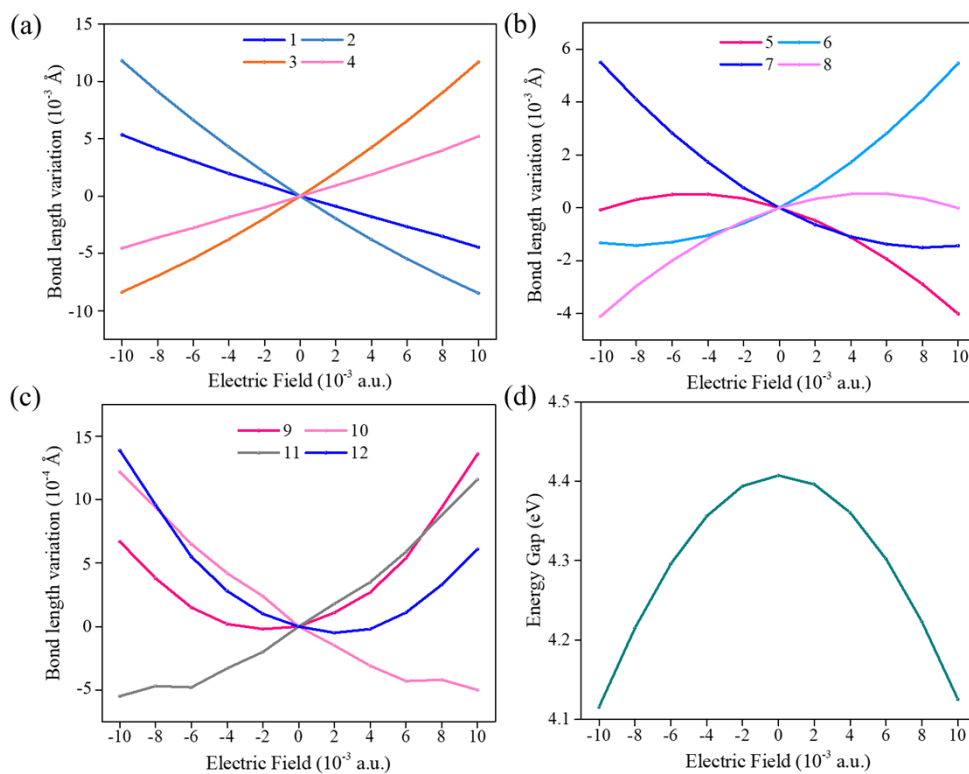

**Fig. S5** Bond length variation at different electric field of (a) C-S bond (b) C-C bond and (c) C-H bond in BDT molecule. (d) The energy gap of HOMO and LUMO at different electric field.

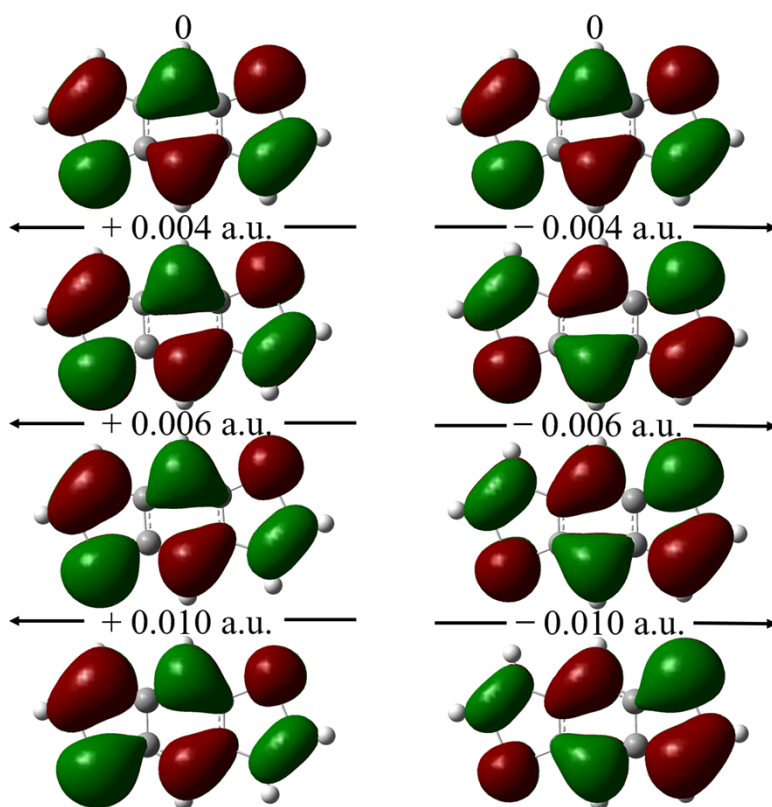

**Fig. S6** HOMO distribution of BDT at different electric field.

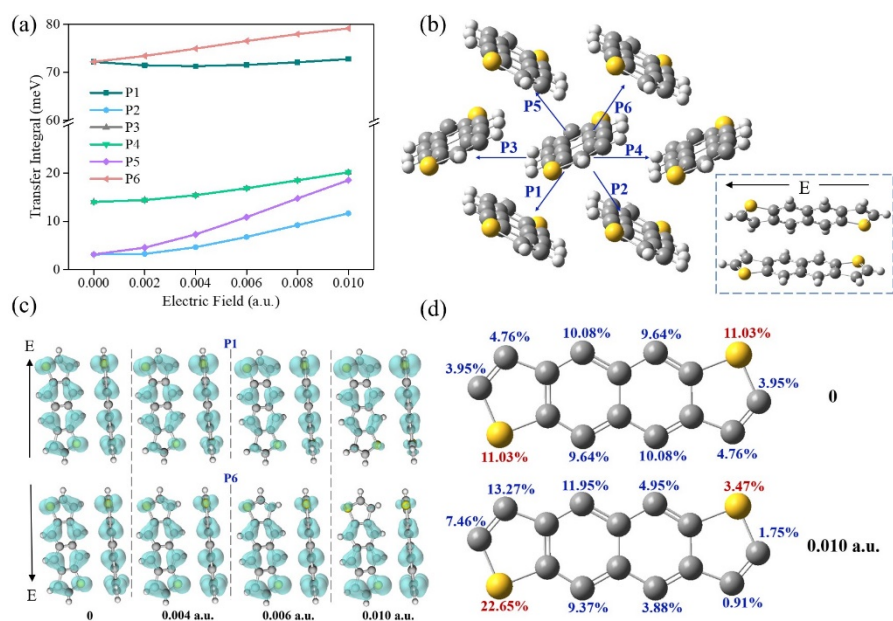

**Fig. S7** (a) Transfer Integral of NDT single crystals at different electric field. (b) The stacking modes of NDT in the xy-plane. The insert figure is the enlarged view of dimer molecules in P1 directions. And the direction of electric field is along z-axis. (c) The electron density of HOMO and HOMO-1 orbitals of dimers in P1 and P6 directions at different electric field. (d) The full atom contributions of HOMO orbital of NDT single molecule at 0 and 0.010 a.u. electric field. For clarity, the H atoms are omitted due to the low contributions.



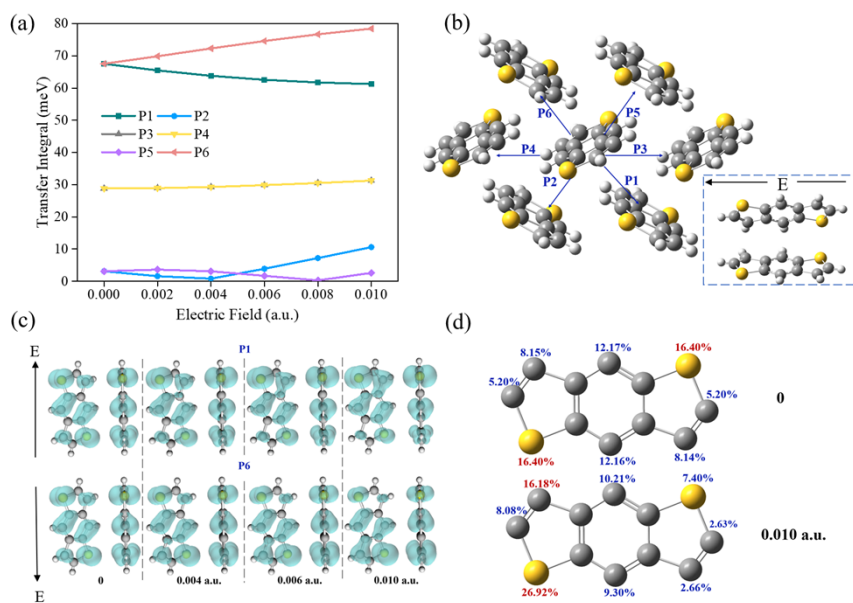

**Fig. S8** (a) Transfer Integral of BDT single crystals at different electric field. (b) The stacking modes of BDT in the xy-plane. The insert figure is the enlarged view of dimer molecules in P1 directions. And the direction of electric field is along z-axis. (c) The electron density of HOMO and HOMO-1 orbitals of dimers in P1 and P6 directions at different electric field. (d) The full atom contributions of HOMO orbital of BDT single molecule at 0 and 0.010 a.u. electric field. For clarity, the H atoms are omitted due to the low contributions.

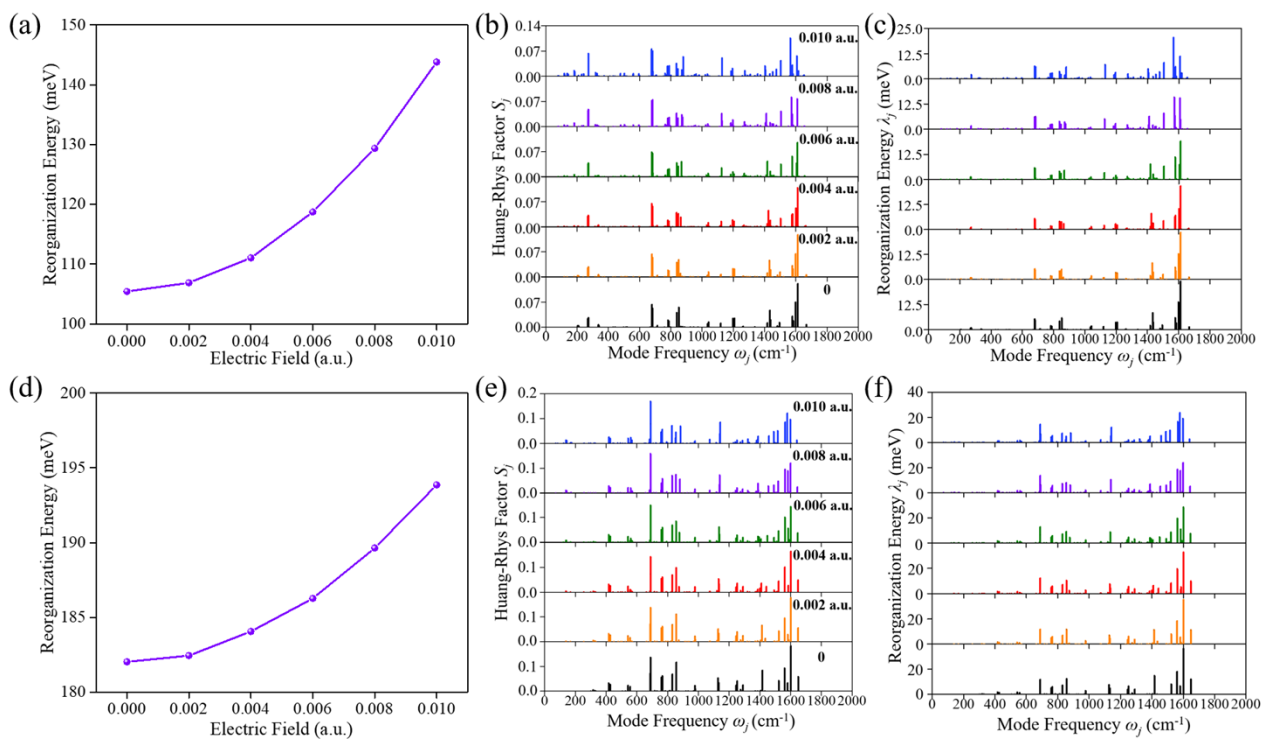

**Fig. S9** Reorganization energy  $\lambda$  of NDT (a) and BDT (d) at different electric field. Huang-Rhys factor  $S_j$  (b) and reorganization energy  $\lambda_j$  (c) versus mode frequency  $\omega_j$  between neutral and positively charged NDT at different electric field. Huang-Rhys factor  $S_j$  (e) and reorganization energy  $\lambda_j$  (f) versus mode frequency  $\omega_j$  between neutral and positively charged BDT at different electric field.

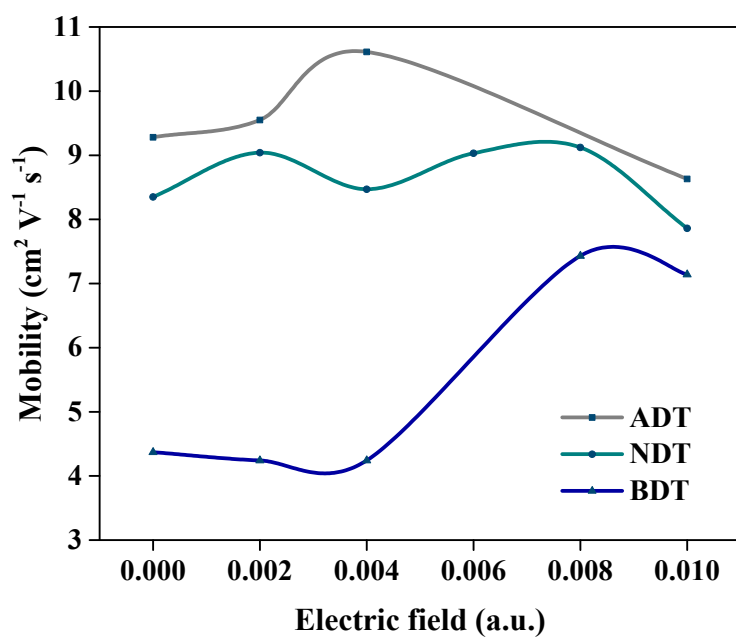

**Fig. S10** The hole mobility of ADT, NDT and BDT along the crystallographic b-axis under different electric field.

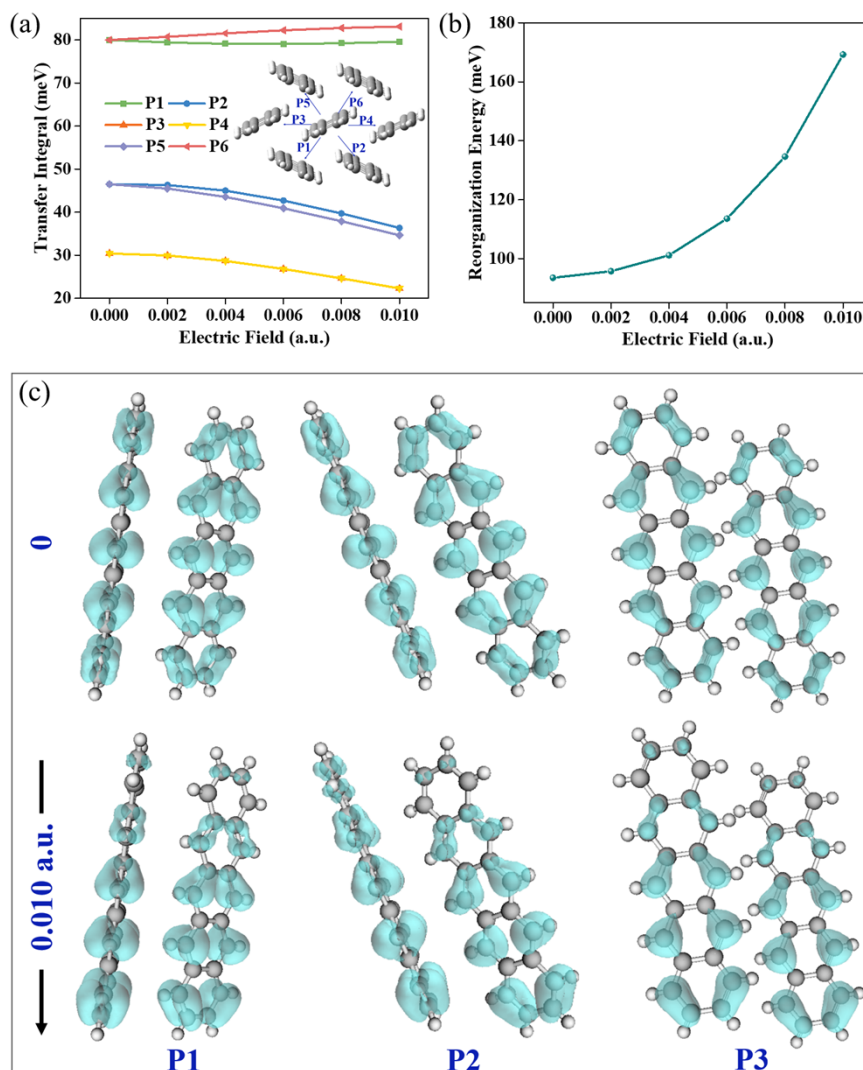

**Fig. S11** (a) Transfer integral and (b) reorganization energy of pentacene single crystals at different electric field. The insert figure shows the packing modes of pentacene in the xy-plane. (c) The electron density of HOMO and HOMO-1 orbitals of pentacene dimers in P1, P2 and P3 directions at different electric field.

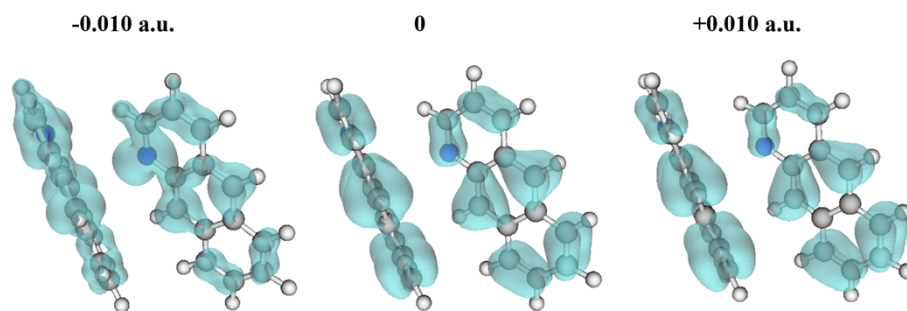

**Fig. S12** Electron density of 1-azaanthracene dimer in P1 direction at different electric field. (Considering the difference in energy degeneracy, HOMO and HOMO-1 orbitals are chosen in 0 and +0.010 a.u. electric field, and the isosurface value is set to 0.003. HOMO-3 ~ HOMO orbitals are chosen in -0.010 a.u. electric field, and the isosurface value is set to 0.006 for clarity.)

**Table S1.** Hole transfer integrals ( $V$ ), reorganization energies ( $\lambda$ ) and charge transfer rate constant ( $k$ ) of **NDT** and **BDT** at different external electric field.

| <b>NDT</b>                  |                                |           |           |           |           |           |                           |                                    |           |              |           |           |
|-----------------------------|--------------------------------|-----------|-----------|-----------|-----------|-----------|---------------------------|------------------------------------|-----------|--------------|-----------|-----------|
| <b>EEF</b><br><b>(a.u.)</b> | <b>Transfer Integral (meV)</b> |           |           |           |           |           | $\lambda$<br><b>(meV)</b> | $k$ ( $\times 10^{12}$ s $^{-1}$ ) |           |              |           |           |
|                             | <b>P1</b>                      | <b>P2</b> | <b>P3</b> | <b>P4</b> | <b>P5</b> | <b>P6</b> |                           | <b>P1</b>                          | <b>P2</b> | <b>P3(4)</b> | <b>P5</b> | <b>P6</b> |
| <b>0</b>                    | 72.22                          | 3.19      | 14.06     | 14.06     | 3.19      | 72.22     | 105.43                    | 96.94                              | 0.19      | 3.68         | 0.19      | 96.94     |
| <b>0.002</b>                | 71.50                          | 3.30      | 14.43     | 14.42     | 4.59      | 73.44     | 106.89                    | 93.04                              | 0.20      | 3.79         | 0.38      | 98.15     |
| <b>0.004</b>                | 71.32                          | 4.68      | 15.44     | 15.43     | 7.33      | 74.97     | 111.05                    | 87.25                              | 0.38      | 4.09         | 0.92      | 96.41     |
| <b>0.006</b>                | 71.58                          | 6.81      | 16.87     | 16.87     | 10.90     | 76.55     | 118.72                    | 78.94                              | 0.72      | 4.38         | 1.83      | 90.28     |
| <b>0.008</b>                | 72.12                          | 9.24      | 18.51     | 18.50     | 14.76     | 77.99     | 129.36                    | 69.25                              | 1.14      | 4.56         | 2.90      | 80.98     |
| <b>0.010</b>                | 72.80                          | 11.67     | 20.17     | 20.16     | 18.54     | 79.17     | 143.78                    | 58.24                              | 1.50      | 4.47         | 3.78      | 68.88     |
| <b>BDT</b>                  |                                |           |           |           |           |           |                           |                                    |           |              |           |           |
| <b>EEF</b><br><b>(a.u.)</b> | <b>Transfer Integral (meV)</b> |           |           |           |           |           | $\lambda$<br><b>(meV)</b> | $k$ ( $\times 10^{12}$ s $^{-1}$ ) |           |              |           |           |
|                             | <b>P1</b>                      | <b>P2</b> | <b>P3</b> | <b>P4</b> | <b>P5</b> | <b>P6</b> |                           | <b>P1</b>                          | <b>P2</b> | <b>P3(4)</b> | <b>P5</b> | <b>P6</b> |
| <b>0</b>                    | 67.54                          | 3.14      | 28.81     | 28.81     | 3.14      | 67.54     | 182.03                    | 30.79                              | 0.07      | 5.59         | 0.07      | 30.79     |
| <b>0.002</b>                | 65.48                          | 1.60      | 28.94     | 28.94     | 3.64      | 69.86     | 182.45                    | 28.79                              | 0.02      | 5.62         | 0.09      | 32.77     |
| <b>0.004</b>                | 63.80                          | 0.84      | 29.30     | 29.30     | 3.11      | 72.27     | 184.06                    | 26.78                              | 0.46      | 5.64         | 0.06      | 34.37     |
| <b>0.006</b>                | 62.56                          | 3.88      | 29.85     | 29.85     | 1.72      | 74.59     | 186.27                    | 25.05                              | 0.10      | 5.70         | 0.02      | 35.62     |
| <b>0.008</b>                | 61.72                          | 7.23      | 30.52     | 30.52     | 0.28      | 76.67     | 189.64                    | 23.41                              | 0.32      | 5.72         | 0         | 36.12     |
| <b>0.010</b>                | 61.23                          | 10.62     | 31.26     | 31.25     | 2.64      | 78.43     | 193.86                    | 21.87                              | 0.65      | 5.70         | 0.04      | 35.89     |

**Table S2.** Hole transfer integrals ( $V$ ), reorganization energies ( $\lambda$ ) and charge transfer rate constant ( $k$ ) of **pentacene** at different external electric field.

| EEF<br>(a.u.) | Transfer Integral (meV) |       |       |       |       |       | $\lambda$<br>(meV) | $k$ ( $\times 10^{12}$ s $^{-1}$ ) |       |       |       |        |
|---------------|-------------------------|-------|-------|-------|-------|-------|--------------------|------------------------------------|-------|-------|-------|--------|
|               | P1                      | P2    | P3    | P4    | P5    | P6    |                    | P1                                 | P2    | P3(4) | P5    | P6     |
| <b>0</b>      | 79.97                   | 46.48 | 30.40 | 30.40 | 46.48 | 79.97 | 93.50              | 141.63                             | 47.85 | 20.47 | 47.85 | 141.63 |
| <b>0.002</b>  | 79.40                   | 46.31 | 29.95 | 29.95 | 45.50 | 80.72 | 95.72              | 135.07                             | 45.95 | 19.22 | 44.36 | 139.60 |
| <b>0.004</b>  | 79.09                   | 44.99 | 28.68 | 28.68 | 43.55 | 81.52 | 101.12             | 123.74                             | 40.04 | 16.27 | 37.52 | 131.47 |
| <b>0.006</b>  | 79.04                   | 42.70 | 26.82 | 26.82 | 40.91 | 82.23 | 113.57             | 103.42                             | 30.18 | 11.91 | 27.71 | 111.94 |
| <b>0.008</b>  | 79.22                   | 39.70 | 24.63 | 24.63 | 37.90 | 82.78 | 134.62             | 77.84                              | 19.55 | 7.52  | 17.82 | 85.00  |
| <b>0.010</b>  | 79.55                   | 36.32 | 22.29 | 22.29 | 34.65 | 83.11 | 169.25             | 50.11                              | 10.45 | 3.93  | 9.51  | 54.69  |

**Table S3.** Hole transfer integrals ( $V$ ), reorganization energies ( $\lambda$ ) and charge transfer rate constants ( $k$ ) of **1-Azaanthracene** at different external electric field.

| EEF<br>(a.u.) | Transfer Integral (meV) |       |       |       |       |       | $\lambda$<br>(meV) | $k$ ( $\times 10^{12}$ s $^{-1}$ ) |      |       |      |      |
|---------------|-------------------------|-------|-------|-------|-------|-------|--------------------|------------------------------------|------|-------|------|------|
|               | P1                      | P2    | P3    | P4    | P5    | P6    |                    | P1                                 | P2   | P3(4) | P5   | P6   |
| <b>-0.010</b> | 26.19                   | 28.17 | 38.97 | 38.97 | 27.62 | 14.23 | 162.26             | 5.93                               | 6.87 | 13.14 | 6.60 | 1.75 |
| <b>-0.008</b> | 23.82                   | 25.08 | 38.00 | 38.00 | 23.38 | 14.46 | 159.82             | 5.06                               | 5.61 | 12.89 | 4.88 | 1.87 |
| <b>-0.006</b> | 21.18                   | 23.79 | 37.56 | 37.56 | 22.65 | 14.84 | 158.64             | 4.06                               | 5.13 | 12.78 | 4.65 | 2.00 |
| <b>-0.004</b> | 19.37                   | 22.87 | 37.61 | 37.61 | 22.34 | 14.99 | 158.09             | 3.42                               | 4.77 | 12.91 | 4.55 | 2.05 |
| <b>-0.002</b> | 18.08                   | 21.19 | 37.85 | 37.85 | 22.01 | 14.94 | 157.97             | 2.99                               | 4.10 | 13.10 | 4.43 | 2.04 |
| <b>0</b>      | 17.08                   | 20.99 | 38.17 | 38.17 | 21.55 | 14.73 | 158.78             | 2.64                               | 3.98 | 13.18 | 4.20 | 1.96 |
| <b>0.002</b>  | 16.25                   | 19.98 | 38.53 | 38.53 | 20.96 | 14.39 | 160.04             | 2.35                               | 3.55 | 13.21 | 3.91 | 1.84 |
| <b>0.004</b>  | 15.49                   | 18.89 | 38.90 | 38.90 | 20.23 | 13.93 | 161.82             | 2.09                               | 3.10 | 13.17 | 3.56 | 1.69 |
| <b>0.006</b>  | 14.75                   | 17.74 | 39.26 | 39.26 | 19.38 | 13.38 | 164.52             | 1.83                               | 2.65 | 12.96 | 3.16 | 1.50 |
| <b>0.008</b>  | 14.02                   | 16.53 | 39.60 | 39.60 | 18.43 | 12.76 | 168.28             | 1.58                               | 2.19 | 12.57 | 2.72 | 1.30 |
| <b>0.010</b>  | 13.26                   | 15.27 | 39.91 | 39.91 | 17.40 | 12.07 | 173.00             | 1.33                               | 1.76 | 12.03 | 2.29 | 1.10 |

**Table S4.** Hole mobility of 1-Azaanthracene at different external electric field along x- and y-axis.

| <b>EEF<br/>(a.u.)</b> | <b>Mobility (cm<sup>2</sup>/V/s)</b> |               |
|-----------------------|--------------------------------------|---------------|
|                       | <b>x-axis</b>                        | <b>y-axis</b> |
| <b>-0.010</b>         | 1.94                                 | 5.76          |
| <b>-0.008</b>         | 1.61                                 | 5.48          |
| <b>-0.006</b>         | 1.42                                 | 5.30          |
| <b>-0.004</b>         | 1.32                                 | 4.99          |
| <b>-0.002</b>         | 1.21                                 | 5.09          |
| <b>0</b>              | 1.09                                 | 5.03          |
| <b>0.002</b>          | 1.01                                 | 4.75          |
| <b>0.004</b>          | 0.93                                 | 4.72          |
| <b>0.006</b>          | 0.78                                 | 4.63          |
| <b>0.008</b>          | 0.71                                 | 4.49          |
| <b>0.010</b>          | 0.61                                 | 4.64          |
